# Supplementary material
Source: Springer Nature journal article supplement (https://www.springermedizin.de/resource/supplementary/12879_2011_1667_MOESM6_ESM.pdf/9443044)

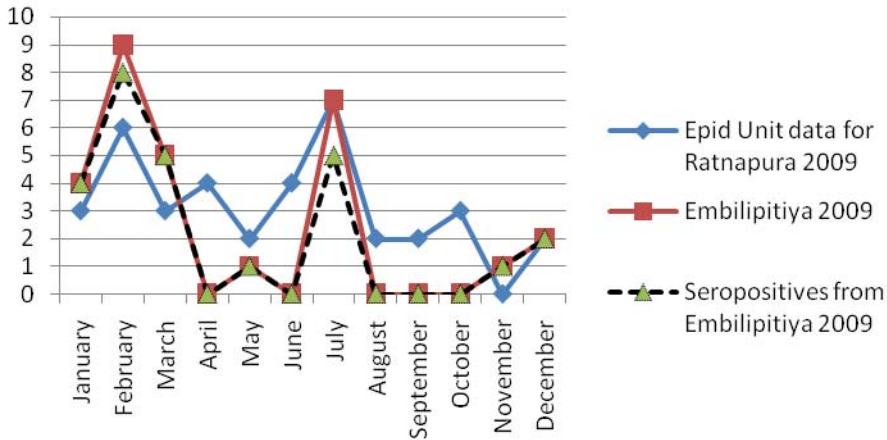

Supplement: MOESM6 [file 9443044]
